# Supplementary material
Source: publisher figshare collection journal article supplement (https://tandf.figshare.com/ndownloader/files/14189996)
Supplement: Supplementary file 1 [file 14189996]

## Supplementary file

## Search strategy VO

**1. Google scholar**

- **Search strategy: Kocuria Kristinae**

Filters: any time; Find articles with all the words Kocuria Kristinae

Results: 1170 hits, 20 met criteria

1. Su H, Li S, Hao Z. Cesarean-Related Kocuria kristinae Bacteremia. International Journal of Medical and Pharmaceutical Case Reports 2015;4(5):113-116.

2. Kim KY, Cho JH, Yu CM, Lee KJ, Lee JM, Koh S, Kwon M, Jeong D. A Case of Community-acquired Bacteremic Empyema Caused by Kocuria kristinae. Infection & Chemotherapy. 2017 Jan 16;49;e49.

3. Lakshmikantha M, Devki V, Yogesh C. Is Kocuria kristinae an upcoming pathogen?. Int. J. Curr. Microbiol. App. Sci. 2015;4(4):885-9.

4. Kimura M, Kawai E, Yaoita H, Ichinoi N, Sakamoto O, Kure S. Central Venous Catheter-Related Bloodstream Infection with Kocuria kristinae in a Patient with Propionic Acidemia. Case Rep Infect Dis. 2017;2017:1254175. doi: 10.1155/2017/1254175

5. Kolikonda MK, Jayakumar P, Sriramula S, Lippmann S. Kocuria kristinae infection during adalimumab treatment. Postgrad Med. 2017 Mar;129(2):296-298. doi: 10.1080/00325481.2017.1250606.

6. Sivaraman U, Subramanian P, Ramakrishnan K, Seetha KS. Umbilical Sepsis Caused by Multidrug Resistant Strain of Kocuria kristinae in a New Born: A Case Report. J Clin Diagn Res. 2016 Apr;10(4):DD01-2. doi: 10.7860/JCDR/2016/15665.7560.

7. Robles-Marhuenda A, Romero-Gómez MP, García-Rodríguez J, Arnalich-Fernández F. Native valve endocarditis caused by Kocuria kristinae. Enferm Infecc Microbiol Clin. 2016 Aug-Sep;34(7):464-5. doi: 10.1016/j.eimc.2015.09.008.

8. Ahmed NH, Biswal I, Roy P, Grover RK. Kocuria kristinae, an unusual pathogen causing opportunistic infections in patients with malignancy. Indian J Med Microbiol. 2014 Oct-Dec;32(4):456-8. doi: 10.4103/0255-0857.142232.

9. Tewari R, Dudeja M, Das AK, Nandy S. Kocuria kristinae in catheter associated urinary tract infection: a case report. J Clin Diagn Res. 2013 Aug;7(8):1692-3. doi: 10.7860/JCDR/2013/6077.3247.

10. Chen HM, Chi H, Chiu NC, Huang FY. Kocuria kristinae: a true pathogen in pediatric patients. J Microbiol Immunol Infect. 2015 Feb;48(1):80-4. doi: 10.1016/j.jmii.2013.07.001.

11. Citro R, Prota C, Greco L, Mirra M, Masullo A, Silverio A, Bossone E, Piscione F. Kocuria kristinae endocarditis related to diabetic foot infection. J Med Microbiol. 2013 Jun;62(Pt 6):932-4. doi: 10.1099/jmm.0.054536-0.

12. Cheung CY, Cheng NH, Chau KF, Li CS. An unusual organism for CAPD-related peritonitis: Kocuria kristinae. Perit Dial Int. 2011 Jan-Feb;31(1):107-8. doi: 10.3747/pdi.2010.00125.

13. Carlini A, Mattei R, Lucarotti I, Bartelloni A, Rosati A. Kocuria kristinae: an unusual cause of acute peritoneal dialysis-related infection. Perit Dial Int. 2011 Jan-Feb;31(1):105-7.

14. Lai CC, Wang JY, Lin SH, Tan CK, Wang CY, Liao CH, Chou CH, Huang YT, Lin HI, Hsueh PR. Catheter-related bacteraemia and infective endocarditis caused by Kocuria species. Clin Microbiol Infect. 2011 Feb;17(2):190-2. doi: 10.1111/j.1469-0691.2010.03211.x.

15. Ma ES, Wong CL, Lai KT, Chan EC, Yam WC, Chan AC. Kocuria kristinae infection associated with acute cholecystitis. BMC Infect Dis. 2005 Jul 19;5:60.

16. Basaglia G, Carretto E, Barbarini D, Moras L, Scalone S, Marone P, De Paoli P. Catheter-related bacteremia due to Kocuria kristinae in a patient with ovarian cancer. J Clin Microbiol. 2002 Jan;40(1):311-3.

17. Folić M, Janković S, Ružić-Zečević D, Pajević V, Rosić N, Nikolić P. Synovitis and periarticular bursitis of the coxofemoral joint caused by Kocuria Kristinae: A case report. Acta Facultatis Medicae Naissensis. 2010 Mar 1;27(1).

18. González-Arenas E, Castro-Soto-Reyes LM, Sánchez-Camacho V, Yalaupari-Mejía JP. Osteoartritis séptica por Kocuria kristinae. Reporte de un caso. Revista Mexicana de Pediatría. 2017 May 15;84(1):21-4.

19. Mutlu M, Aslan Y, Gokdogan D, Surer L, Aktas F. Septic arthritis caused by Kocuria kristinae in a newborn. Hong Kong Journal of Paediatrics. 2013 Oct 1;18(4):223-5.

20. Seyman D, Kizilates F, Oztoprak N, Ayoglu RU, Arslan S. Kocuria kristinae: a rare cause of infective endocarditis involving 2 native valves. Infectious Diseases in Clinical Practice. 2013 Nov 1;21(6):407-9.

**2. PUBMED**

- **Search strategy:**

((((kocuria) AND kristinae) AND ((invasive infection OR infection OR sepsis OR SIRS OR catheter related infection OR invasive infections OR infections OR encephalitis OR meningitis OR brain infection OR otitis OR pneumonia OR endocarditis OR respiratory infection OR nasopharyngitis OR gastritis OR gastroenteritis OR pancreatitis OR hepatitis OR cholecystitis OR peritonitis OR myelitis OR urinary infection OR abscess)))) AND (((kocuria) AND kristinae) AND ((invasive infection OR infection OR sepsis OR SIRS OR catheter related infection OR invasive infections OR infections OR encephalitis OR meningitis OR brain infection OR otitis OR pneumonia OR endocarditis OR respiratory infection OR nasopharyngitis OR gastritis OR gastroenteritis OR pancreatitis OR hepatitis OR cholecystitis OR peritonitis OR myelitis OR urinary infection OR abscess))[MeSH Terms])

31 hits

After applying filters (Humans, Clinical trials, case reports, observational study) 19 hits

**14 met criteria:**

1. Chen HM, Chi H, Chiu NC, Huang FY. Kocuria kristinae: a true pathogen in pediatric patients. J Microbiol Immunol Infect. 2015 Feb;48(1):80-4. doi: 10.1016/j.jmii.2013.07.001.
2. Lai CC, Wang JY, Lin SH, Tan CK, Wang CY, Liao CH, Chou CH, Huang YT, Lin HI, Hsueh PR. Catheter-related bacteraemia and infective endocarditis caused by Kocuria species. Clin Microbiol Infect. 2011 Feb;17(2):190-2. doi: 10.1111/j.1469-0691.2010.03211.x.
3. Cheung CY, Cheng NH, Chau KF, Li CS. An unusual organism for CAPD-related peritonitis: Kocuria kristinae. Perit Dial Int. 2011 Jan-Feb;31(1):107-8. doi: 10.3747/pdi.2010.00125.
4. Ma ES, Wong CL, Lai KT, Chan EC, Yam WC, Chan AC. Kocuria kristinae infection associated with acute cholecystitis. BMC Infect Dis. 2005 Jul 19;5:60.
5. Basaglia G, Carretto E, Barbarini D, Moras L, Scalone S, Marone P, De Paoli P. Catheter-related bacteremia due to Kocuria kristinae in a patient with ovarian cancer. J Clin Microbiol. 2002 Jan;40(1):311-3.
6. Citro R, Prota C, Greco L, Mirra M, Masullo A, Silverio A, Bossone E, Piscione F. Kocuria kristinae endocarditis related to diabetic foot infection. J Med Microbiol. 2013 Jun;62(Pt 6):932-4. doi: 10.1099/jmm.0.054536-0.
7. Carlini A, Mattei R, Lucarotti I, Bartelloni A, Rosati A. Kocuria kristinae: an unusual cause of acute peritoneal dialysis-related infection. Perit Dial Int. 2011 Jan-Feb;31(1):105-7.
8. Karadag Oncel E, Boyraz MS, Kara A. Black tongue associated with Kocuria (Micrococcus) kristinae bacteremia in a 4-month-old infant. Eur J Pediatr. 2012 Mar;171(3):593.
9. Boudewijns M, Vandeven J, Verhaegen J, Ben-Ami R, Carmeli Y. Vitek 2 automated identification system and Kocuria kristinae. J Clin Microbiol. 2005 Nov;43(11):5832;
10. Ahmed NH, Biswal I, Roy P, Grover RK. Kocuria kristinae, an unusual pathogen causing opportunistic infections in patients with malignancy. Indian J Med Microbiol. 2014 Oct-Dec;32(4):456-8. doi: 10.4103/0255-0857.142232.
11. Robles-Marhuenda A, Romero-Gómez MP, García-Rodríguez J, Arnalich-Fernández F. Native valve endocarditis caused by Kocuria kristinae. Enferm Infecc Microbiol Clin. 2016 Aug-Sep;34(7):464-5. doi: 10.1016/j.eimc.2015.09.008.
12. Martinaud C, Gisserot O, Gaillard T, Brisou P, de Jaureguiberry JP. [Bacteremia caused by Kocuria kristinae in a patient with acute leukaemia]. Med Mal Infect. 2008 Jun;38(6):334-5. doi: 10.1016/j.medmal.2008.02.006. **French.**
13. Martinaud C, Gaillard T, Brisou P, Gisserot O, de Jaureguiberry JP. [Bacteremia caused by Kocuria kristinae in a patient with acute leukaemia]. Med Mal Infect. 2008 Mar;38(3):165-6. doi: 10.1016/j.medmal.2007.11.006. Epub 2008 Jan 10. **French.**
14. Kolikonda MK, Jayakumar P, Sriramula S, Lippmann S. Kocuria kristinae infection during adalimumab treatment. Postgrad Med. 2017 Mar;129(2):296-298. doi: 10.1080/00325481.2017.1250606.

**3. CLINICALTRIALS.GOV**

Search strategy: Kocuria kristinae

0 hits

**4. SCIndeks**

**Search strategy:**

**(ARTAK: ((kocuria) AND kristinae) AND ((invasive infection OR infection OR sepsis OR SIRS OR catheter related infection OR invasive infections OR infections OR encephalitis OR meningitis OR brain infection OR otitis OR pneumonia OR endocarditis OR respiratory infection OR nasopharyngitis OR gastritis OR gastroenteritis OR pancreatitis OR hepatitis OR cholecystitis OR peritonitis OR myelitis OR urinary infection OR abscess)))**

1 hit, 1 met criteria

1. Folić M, Janković S, Ružić-Zečević D, Pajević V, Rosić N, Nikolić P. Synovitis and periarticular bursitis of the coxofemoral joint caused by Kocuria Kristinae: A case report. Acta Facultatis Medicae Naissensis. 2010 Mar 1;27(1).

**5. Cochrane database of published clinical trials – CENTRAL**

**Search strategy:**

**((kocuria) AND kristinae) AND ((invasive infection OR infection OR sepsis OR SIRS OR catheter related infection OR invasive infections OR infections OR encephalitis OR meningitis OR brain infection OR otitis OR pneumonia OR endocarditis OR respiratory infection OR nasopharyngitis OR gastritis OR gastroenteritis OR pancreatitis OR hepatitis OR cholecystitis OR peritonitis OR myelitis OR urinary infection OR abscess))**

**1 result from 1145093 records** (Microbiological contamination of drugs during their administration for anesthesia in the operating room Anesthesiology. 124 (4) (pp 785-794), 2016. Date of publication: 2016., 2016Online Publication Date: 2016),

0 met criteria

**6. SCOPUS**

**Search strategy: (kocuria) AND kristinae)**

101 hits, 17 met criteria

1. Kolikonda MK, Jayakumar P, Sriramula S, Lippmann S. Kocuria kristinae infection during adalimumab treatment. Postgrad Med. 2017 Mar;129(2):296-298. doi: 10.1080/00325481.2017.1250606.
2. González-Arenas E, Castro-Soto-Reyes LM, Sánchez-Camacho V, Yalaupari-Mejía JP. Osteoartritis séptica por Kocuria kristinae. Reporte de un caso. Revista Mexicana de Pediatría. 2017 May 15;84(1):21-4.
3. Robles-Marhuenda A, Romero-Gómez MP, García-Rodríguez J, Arnalich-Fernández F. Native valve endocarditis caused by Kocuria kristinae. Enferm Infecc Microbiol Clin. 2016 Aug-Sep;34(7):464-5. doi: 10.1016/j.eimc.2015.09.008.
4. Bhavsar SM, Hamula CL, Dingle TC. Report of two paediatric cases of central line infections caused by species of the genus Kocuria. JMM case reports. 2016 Jun 25;3(3).
5. Sivaraman U, Subramanian P, Ramakrishnan K, Seetha KS. Umbilical Sepsis Caused by Multidrug Resistant Strain of Kocuria kristinae in a New Born: A Case Report. J Clin Diagn Res. 2016 Apr;10(4):DD01-2. doi: 10.7860/JCDR/2016/15665.7560.
6. Chen HM, Chi H, Chiu NC, Huang FY. Kocuria kristinae: a true pathogen in pediatric patients. J Microbiol Immunol Infect. 2015 Feb;48(1):80-4. doi: 10.1016/j.jmii.2013.07.001.
7. Ahmed NH, Biswal I, Roy P, Grover RK. Kocuria kristinae, an unusual pathogen causing opportunistic infections in patients with malignancy. Indian J Med Microbiol. 2014 Oct-Dec;32(4):456-8. doi: 10.4103/0255-0857.142232.
8. Mutlu M, Aslan Y, Gokdogan D, Surer L, Aktas F. Septic arthritis caused by Kocuria kristinae in a newborn. Hong Kong Journal of Paediatrics. 2013 Oct 1;18(4):223-5.
9. Seyman D, Kizilates F, Oztoprak N, Ayoglu RU, Arslan S. Kocuria kristinae: a rare cause of infective endocarditis involving 2 native valves. Infectious Diseases in Clinical Practice. 2013 Nov 1;21(6):407-9.
10. Tewari R, Dudeja M, Das AK, Nandy S. Kocuria kristinae in catheter associated urinary tract infection: a case report. J Clin Diagn Res. 2013 Aug;7(8):1692-3. doi: 10.7860/JCDR/2013/6077.3247
11. Citro R, Prota C, Greco L, Mirra M, Masullo A, Silverio A, Bossone E, Piscione F. Kocuria kristinae endocarditis related to diabetic foot infection. J Med Microbiol. 2013 Jun;62(Pt 6):932-4. doi: 10.1099/jmm.0.054536-0.
12. Cheung CY, Cheng NH, Chau KF, Li CS. An unusual organism for CAPD-related peritonitis: Kocuria kristinae. Perit Dial Int. 2011 Jan-Feb;31(1):107-8. doi: 10.3747/pdi.2010.00125.
13. Folić M, Janković S, Ružić-Zečević D, Pajević V, Rosić N, Nikolić P. Synovitis and periarticular bursitis of the coxofemoral joint caused by Kocuria Kristinae: A case report. Acta Facultatis Medicae Naissensis. 2010 Mar 1;27(1).
14. Carlini A, Mattei R, Lucarotti I, Bartelloni A, Rosati A. Kocuria kristinae: an unusual cause of acute peritoneal dialysis-related infection. Perit Dial Int. 2011 Jan-Feb;31(1):105-7.
15. Lai CC, Wang JY, Lin SH, Tan CK, Wang CY, Liao CH, Chou CH, Huang YT, Lin HI, Hsueh PR. Catheter-related bacteraemia and infective endocarditis caused by Kocuria species. Clin Microbiol Infect. 2011 Feb;17(2):190-2. doi: 10.1111/j.1469-0691.2010.03211.x.
16. Ma ES, Wong CL, Lai KT, Chan EC, Yam WC, Chan AC. Kocuria kristinae infection associated with acute cholecystitis. BMC Infect Dis. 2005 Jul 19;5:60.
17. Basaglia G, Carretto E, Barbarini D, Moras L, Scalone S, Marone P, De Paoli P. Catheter-related bacteremia due to Kocuria kristinae in a patient with ovarian cancer. J Clin Microbiol. 2002 Jan;40(1):311-3.

**7. EBSCO**

**Search strategy:**

**((kocuria) AND kristinae) AND ((invasive infection OR infection OR sepsis OR SIRS OR catheter related infection OR invasive infections OR infections OR encephalitis OR meningitis OR brain infection OR otitis OR pneumonia OR endocarditis OR respiratory infection OR nasopharyngitis OR gastritis OR gastroenteritis OR pancreatitis OR hepatitis OR cholecystitis OR peritonitis OR myelitis OR urinary infection OR abscess))**

415 hits, after applying filters (academic journals) 299 hits, filter subject ( micrococcus, micrococcacae) 20 hits,

14 met criteria

1. Kimura M, Kawai E, Yaoita H, Ichinoi N, Sakamoto O, Kure S. Central Venous Catheter-Related Bloodstream Infection with Kocuria kristinae in a Patient with Propionic Acidemia. Case Rep Infect Dis. 2017;2017:1254175. doi: 10.1155/2017/1254175

2. Chen HM, Chi H, Chiu NC, Huang FY. Kocuria kristinae: a true pathogen in pediatric patients. J Microbiol Immunol Infect. 2015 Feb;48(1):80-4. doi: 10.1016/j.jmii.2013.07.001.

3. Ma ES, Wong CL, Lai KT, Chan EC, Yam WC, Chan AC. Kocuria kristinae infection associated with acute cholecystitis. BMC Infect Dis. 2005 Jul 19;5:60.

4. Lai CC, Wang JY, Lin SH, Tan CK, Wang CY, Liao CH, Chou CH, Huang YT, Lin HI, Hsueh PR. Catheter-related bacteraemia and infective endocarditis caused by Kocuria species. Clin Microbiol Infect. 2011 Feb;17(2):190-2. doi: 10.1111/j.1469-0691.2010.03211.x.

5. Ahmed NH, Biswal I, Roy P, Grover RK. Kocuria kristinae, an unusual pathogen causing opportunistic infections in patients with malignancy. Indian J Med Microbiol. 2014 Oct-Dec;32(4):456-8. doi: 10.4103/0255-0857.142232.

6. Jermakow K, Mikołajków A, Pajączkowska M, Reczuch J, Fleischer M. Bakteriemia O Etiologii Kocuria Kristinae U Dziecka Przedwcześnie Urodzonego. Zakażenia Wywoływane Przez Szczepy Kocuria - Florę Fizjologiczną Skóry. Forum Zakażeń 2015;6(6):379-385. [Bloodstream Infection Due To Kocuria Kristinae In Preterm Infant. Infections Caused By Kocuria Strains - Human Skin Commensals. (English)]

7. Sivaraman U, Subramanian P, Ramakrishnan K, Seetha KS. Umbilical Sepsis Caused by Multidrug Resistant Strain of Kocuria kristinae in a New Born: A Case Report. J Clin Diagn Res. 2016 Apr;10(4):DD01-2. doi: 10.7860/JCDR/2016/15665.7560.

8. Citro R, Prota C, Greco L, Mirra M, Masullo A, Silverio A, Bossone E, Piscione F. Kocuria kristinae endocarditis related to diabetic foot infection. J Med Microbiol. 2013 Jun;62(Pt 6):932-4. doi: 10.1099/jmm.0.054536-0.

9. Robles-Marhuenda A, Romero-Gómez MP, García-Rodríguez J, Arnalich-Fernández F. Native valve endocarditis caused by Kocuria kristinae. Enferm Infecc Microbiol Clin. 2016 Aug-Sep;34(7):464-5. doi: 10.1016/j.eimc.2015.09.008.

10. Carlini A, Mattei R, Lucarotti I, Bartelloni A, Rosati A. Kocuria kristinae: an unusual cause of acute peritoneal dialysis-related infection. Perit Dial Int. 2011 Jan-Feb;31(1):105-7.

11. Cheung CY, Cheng NH, Chau KF, Li CS. An unusual organism for CAPD-related peritonitis: Kocuria kristinae. Perit Dial Int. 2011 Jan-Feb;31(1):107-8. doi: 10.3747/pdi.2010.00125.

12. Basaglia G, Carretto E, Barbarini D, Moras L, Scalone S, Marone P, De Paoli P. Catheter-related bacteremia due to Kocuria kristinae in a patient with ovarian cancer. J Clin Microbiol. 2002 Jan;40(1):311-3.

13. Boudewijns M, Vandeven J, Verhaegen J, Ben-Ami R, Carmeli Y. Vitek 2 automated identification system and Kocuria kristinae. J Clin Microbiol. 2005 Nov;43(11):5832.

14. Martinaud C, Gaillard T, Brisou P, Gisserot O, de Jaureguiberry JP. [Bacteremia caused by Kocuria kristinae in a patient with acute leukaemia]. Med Mal Infect. 2008 Mar;38(3):165-6. doi: 10.1016/j.medmal.2007.11.006. Epub 2008 Jan 10. French.

## Search strategy RZZ

**MEDLINE PubMed**

48 hits 12 meets criteria

(kocuria[All Fields] AND kristinae[All Fields]) OR ("infection"[MeSH Terms] OR "infection"[All Fields]) OR ("sepsis"[MeSH Terms] OR "sepsis"[All Fields]) OR ("bacteraemia"[All Fields] OR "bacteremia"[MeSH Terms] OR "bacteremia"[All Fields]) OR ("abscess"[MeSH Terms] OR "abscess"[All Fields]) OR ("cholecystitis"[MeSH Terms] OR "cholecystitis"[All Fields]) OR ("pneumonia"[MeSH Terms] OR "pneumonia"[All Fields]) OR ("endocarditis"[MeSH Terms] OR "endocarditis"[All Fields]) OR ("meningitis"[MeSH Terms] OR "meningitis"[All Fields]) OR ("cystitis"[MeSH Terms] OR "cystitis"[All Fields]) OR ("osteoarthritis"[MeSH Terms] OR "osteoarthritis"[All Fields])

**Included studies**

1.Ma ES, Wong CL, Lai KT, Chan EC, Yam WC, Chan AC.Kocuriakristinae infection associated with acute cholecystitis. BMC Infect Dis. 2005 Jul 19;5:60.

2.Basaglia G, Carretto E, Barbarini D, Moras L, Scalone S, Marone P, De Paoli P.Catheter-Related Bacteremia Due to Kocuriakristinae in aPatient with Ovarian Cancer. J ClinMicrobiol. 2002 Jan;40(1):311-3.

3.Robles-Marhuenda A, Romero-Gómez MP, García-Rodríguez J, Arnalich-FernándezF.Native valve endocarditis caused by KocuriaKristinae.EnfermInfeccMicrobiolClin. 2016 Aug-Sep;34(7):464-5. doi: 10.1016/j.eimc.2015.09.008

4.Ahmed NH, Biswal I, Roy P, Grover RK.Kocuriakristinae, an unusual pathogen causing opportunistic infections in patientswith malignancy. Indian J Med Microbiol. 2014 Oct-Dec;32(4):456-8. doi: 10.4103/0255-0857.142232

5.Citro R, Prota C, Greco L, Mirra M, Masullo A, Silverio A, Bossone E, Piscione F.Kocuriakristinae endocarditis related to diabeticfoot infection. J Med Microbiol. 2013 Jun;62(Pt 6):932-4. doi: 10.1099/jmm.0.054536-0.

6. Kolikonda MK, Jayakumar P, Sriramula S, Lippmann S.Kocuriakristinae infection during adalimumab Treatment. Postgrad Med. 2017 Mar;129(2):296-298. doi: 10.1080/00325481.2017.1250606.

7. Sivaraman U, Subramanian P, Ramakrishnan K, Seetha KS. Umbilical Sepsis Caused by Multidrug Resistant Strain of Kocuriakristinae ina New Born: A Case Report. J ClinDiagn Res. 2016 Apr;10(4):DD01-2. doi: 10.7860/JCDR/2016/15665.7560

8. Chen HM, Chi H, Chiu NC, Huang FY.Kocuriakristinae: A true pathogen in pediatric patients. J MicrobiolImmunol Infect. 2015 Feb;48(1):80-4. doi: 10.1016/j.jmii.2013.07.001

9.Carlini A, Mattei R, Lucarotti I, Bartelloni A, Rosati A.Kocuriakristinae: an Unusual Cause of Acute peritoneal dialysis related Infection.Perit Dial Int. 2011 Jan-Feb;31(1):105-7. doi: 10.3747/pdi.2010.00132.

10.Lai CC, Wang JY, Lin SH, Tan CK, Wang CY, Liao CH, Chou CH, Huang YT, Lin HI, Hsueh PR.Catheter-related bacteraemia and infectiveendocarditis caused by Kocuria species.ClinMicrobiol Infect. 2011 Feb;17(2):190-2. doi: 10.1111/j.1469-0691.2010.03211.x.

11.Kimura M, Kawai E, Yaoita H, Ichinoi N, Sakamoto O, Kure S.Central Venous Catheter-Related Bloodstream Infection withKocuriakristinae in a Patient with Propionic Acidemia. Case Rep Infect Dis. 2017;2017:1254175. doi: 10.1155/2017/1254175

12. Aleksic D, Miletic-Drakulic S, Boskovic-Matic T, Simovic S, Toncev G. Unusual case of stroke related to Kocuria Kristinae endocarditis treated with surgical procedure. HIPPOKRATIA 2016, 20, 3: 231-234

**Excluded studies**

1.Dunn R, Bares S, David MZ.Central venous catheter-related bacteremia caused by Kocuriakristinae: Case report andreview of the literature Ann ClinMicrobiolAntimicrob. 2011 Aug 24;10:31. doi: 10.1186/1476-0711-10-31.

2. Hassan RM, Bassiouny DM, Matar Y.Bacteremia Caused by Kocuriakristinae from Egypt: Are There More? A Case Report and Review of the Literature. Case Rep Infect Dis. 2016;2016:6318064.

3.Chávez Valencia V, Orizaga de la Cruz C, AguilarBixano O, Huerta Ruíz MK, SánchezEstrada EE.Infeccionesasociadas a Kocuriakristinae: presentación de dos casos y revisión de la literatura.Gac Med Mex. 2014 Dec;150 Suppl 2:183-5.

**ClinicalTrials.gov**

Kocuria kristinae

0 hits

**Cohrane**

Kocuria kristinae

1 hits 0 meets criteria

**Scopus**

Kocuria Kristinae

0 hits

**Google scholar**

Kocuria kristinae

1170 hits 2 meets criteria

1.Tewari R, Dudeja M, Das AK, Nandy S. KocuriaKristinae in Catheter Associated Urinary Tract Infection: A Case Report. J ClinDiagn Res. 2013 Aug;7(8):1692-3. doi: 10.7860/JCDR/2013/6077.3247.

2.Mapary Lakshmikantha, Verma Devki and ChanderYogesh.Is Kocuria kristinae an upcoming pathogen? Int. J. Curr. Microbiol. App. Sci 2015; 4(4): 885-889.

**EBSCO**

671 hits-6 meets criteria

1. Efrén González-Arenas, Laura Mercedes Castro-Soto-Reyes, VerónicaSánchez-Camacho, Juan Pablo Yalaupari-Mejía. Osteoartritis séptica por Kocuriakristinae. Reporte de uncaso.Revista Mexicana de PEDIATRÍA Vol. 84, No. 1, 2017 pp 21-24

2. HandeBERK ,Nefise ÖZTOPRAK ÇUVALCI , Derya SEYMAN, Filiz KIZILATEŞ , Alper TAHMAZ, Ümit REZZUKOĞLU.ToplumKökenliİnfektifEndokarditin Nadir Etkenlerinden, Kocuriakristinae: İkiOlguSunumu. FLORA 2017;22(1):47-50 • doi: 10.5578/flora.26401

3.Marko Folić, Slobodan Janković, Dejana Ružić-Zečević, Velimir Pajević ,Nikola Rosić , Predrag Nikolić.Synovitis And Periarticular Bursitis Of The Coxofemoral Joint Caused By KocuriaKristinae: A Case Report. Scientific Journal of the Faculty of Medicine in Niš 2010;27(1):51-54

4. Seyman, Derya; Kizilates, Filiz; Oztoprak, Nefise ; Ayoglu, Raif Umut ; Arslan, Sakir MD.Kocuria kristinae: A Rare Cause of Infective Endocarditis Involving 2 Native Valves. Infectious Diseases in Clinical Practice: November 2013 - Volume 21 - Issue 6 - p 407–409

5. C.Y. Cheung ,N.H.Y. Cheng ,K.F. Chau ,C.S. Li. An Unusual Organism for CAPD-Related Peritonitis: Kocuria kristinae. Peritoneal Dialysis International: Journal Of The International Society For Peritoneal Dialysis [Perit Dial Int] 2011 Jan-Feb; Vol. 31 (1), pp. 107-8.

6. Martinaud, C.; Gaillard, T.; Brisou, P.; Gisserot, O.; de Jaureguiberry, J.-P. Bactériémie à Kocuria kristinae au cours d’une leucémie aiguë. MEDECINE ET MALADIES INFECTIEUSES. 38(3):165-166

## Search strategy AP

**PUBMED**

**Search strategy:** (Kocuria[All Fields] OR ("micrococcus"[MeSH Terms] OR "micrococcus"[All Fields])) AND kristinae[All Fields] AND (("infection"[MeSH Terms] OR "infection"[All Fields]) OR ("infection"[MeSH Terms] OR "infection"[All Fields] OR "infections"[All Fields]) OR "bloodstream infection"[All Fields] OR ("endocarditis"[MeSH Terms] OR "endocarditis"[All Fields]) OR ("sepsis"[MeSH Terms] OR "sepsis"[All Fields]) OR "urinary tract infection"[All Fields] OR pathogen[All Fields] OR ("bacteraemia"[All Fields] OR "bacteremia"[MeSH Terms] OR "bacteremia"[All Fields]) OR ("bacteraemia"[All Fields] OR "bacteremia"[MeSH Terms] OR "bacteremia"[All Fields]) OR ("peritonitis"[MeSH Terms] OR "peritonitis"[All Fields]) OR ("cholecystitis"[MeSH Terms] OR "cholecystitis"[All Fields]) OR ("synovitis"[MeSH Terms] OR "synovitis"[All Fields]) OR ("bursitis"[MeSH Terms] OR "bursitis"[All Fields]) OR ("osteoarthritis"[MeSH Terms] OR "osteoarthritis"[All Fields]) OR ("arthritis"[MeSH Terms] OR "arthritis"[All Fields]) OR ("empyema"[MeSH Terms] OR "empyema"[All Fields]) OR ("catheters"[MeSH Terms] OR "catheters"[All Fields] OR "catheter"[All Fields]) OR ("catheterization"[MeSH Terms] OR "catheterization"[All Fields] OR "catheterized"[All Fields]) OR ("patients"[MeSH Terms] OR "patients"[All Fields] OR "patient"[All Fields]) OR ("pneumonia"[MeSH Terms] OR "pneumonia"[All Fields]) OR ("bronchitis"[MeSH Terms] OR "bronchitis"[All Fields]) OR ("sinusitis"[MeSH Terms] OR "sinusitis"[All Fields]) OR ("encephalitis"[MeSH Terms] OR "encephalitis"[All Fields]) OR ("meningitis"[MeSH Terms] OR "meningitis"[All Fields]) OR ("abscess"[MeSH Terms] OR "abscess"[All Fields]))

**Total number of results**: 33

**Number of publications which fulfill inclusion criteria**: 15

1. Kimura M, Kawai E, Yaoita H, Ichinoi N, Sakamoto O, Kure S. Central Venous Catheter-Related Bloodstream Infection with Kocuria kristinae in a Patient with Propionic Acidemia. Case Rep Infect Dis. 2017;2017:1254175. doi: 10.1155/2017/1254175

2. Kolikonda MK, Jayakumar P, Sriramula S, Lippmann S. Kocuria kristinae infection during adalimumab treatment. Postgrad Med. 2017 Mar;129(2):296-298. doi: 10.1080/00325481.2017.1250606.

3. Aleksic D, Miletic-Drakulic S, Boskovic-Matic T, Simovic S, Toncev G. Unusual case of stroke related to Kocuria Kristinae endocarditis treated with surgical procedure. Hippokratia. 2016 Jul-Sep;20(3):231-234.

4. Sivaraman U, Subramanian P, Ramakrishnan K, Seetha KS. Umbilical Sepsis Caused by Multidrug Resistant Strain of Kocuria kristinae in a New Born: A Case Report. J Clin Diagn Res. 2016 Apr;10(4):DD01-2. doi: 10.7860/JCDR/2016/15665.7560.

5. Robles-Marhuenda A, Romero-Gómez MP, García-Rodríguez J, Arnalich-Fernández F. Native valve endocarditis caused by Kocuria kristinae. Enferm Infecc Microbiol Clin. 2016 Aug-Sep;34(7):464-5. doi: 10.1016/j.eimc.2015.09.008.

6. Ahmed NH, Biswal I, Roy P, Grover RK. Kocuria kristinae, an unusual pathogen causing opportunistic infections in patients with malignancy. Indian J Med Microbiol. 2014 Oct-Dec;32(4):456-8. doi: 10.4103/0255-0857.142232.

7. Tewari R, Dudeja M, Das AK, Nandy S. Kocuria kristinae in catheter associated urinary tract infection: a case report. J Clin Diagn Res. 2013 Aug;7(8):1692-3. doi: 10.7860/JCDR/2013/6077.3247.

8. Chen HM, Chi H, Chiu NC, Huang FY. Kocuria kristinae: a true pathogen in pediatric patients. J Microbiol Immunol Infect. 2015 Feb;48(1):80-4. doi: 10.1016/j.jmii.2013.07.001.

9. Citro R, Prota C, Greco L, Mirra M, Masullo A, Silverio A, Bossone E, Piscione F. Kocuria kristinae endocarditis related to diabetic foot infection. J Med Microbiol. 2013 Jun;62(Pt 6):932-4. doi: 10.1099/jmm.0.054536-0.

10. Dunn R, Bares S, David MZ. Central venous catheter-related bacteremia caused by Kocuria kristinae: case report and review of the literature. Ann Clin Microbiol Antimicrob. 2011 Aug 24;10:31. doi: 10.1186/1476-0711-10-31.

11. Cheung CY, Cheng NH, Chau KF, Li CS. An unusual organism for CAPD-related peritonitis: Kocuria kristinae. Perit Dial Int. 2011 Jan-Feb;31(1):107-8. doi: 10.3747/pdi.2010.00125.

12. Carlini A, Mattei R, Lucarotti I, Bartelloni A, Rosati A. Kocuria kristinae: an unusual cause of acute peritoneal dialysis-related infection. Perit Dial Int. 2011 Jan-Feb;31(1):105-7.

13. Lai CC, Wang JY, Lin SH, Tan CK, Wang CY, Liao CH, Chou CH, Huang YT, Lin HI, Hsueh PR. Catheter-related bacteraemia and infective endocarditis caused by Kocuria species. Clin Microbiol Infect. 2011 Feb;17(2):190-2. doi: 10.1111/j.1469-0691.2010.03211.x.

14. Ma ES, Wong CL, Lai KT, Chan EC, Yam WC, Chan AC. Kocuria kristinae infection associated with acute cholecystitis. BMC Infect Dis. 2005 Jul 19;5:60.

15. Basaglia G, Carretto E, Barbarini D, Moras L, Scalone S, Marone P, De Paoli P. Catheter-related bacteremia due to Kocuria kristinae in a patient with ovarian cancer. J Clin Microbiol. 2002 Jan;40(1):311-3.

**K. Kristinae publications which don’t fulfill inclusion criteria:**

1. Aydin M, Ganschow R, Jankofsky M. Kocuria kristinae-caused sepsis in an infant with congenital tufting enteropathy. Turk J Pediatr. 2017;59(1):93-96. doi:10.24953/turkjped.2017.01.018. – another isolate: *S. epidermidis*

2. Hassan RM, Bassiouny DM, Matar Y. Bacteremia Caused by Kocuria kristinae from Egypt: Are There More? A Case Report and Review of the Literature. Case Rep Infect Dis. 2016;2016:6318064. – another isolate: *E. coli* from urine

3. Chávez Valencia V, Orizaga de la Cruz C, Aguilar Bixano O, Huerta Ruíz MK, Sánchez Estrada EE. [Infections due to Kocuria kristinae: case reports of two patients and review of the literature]. Gac Med Mex. 2014 Dec;150 Suppl 2:183-5. Spanish. – two cases – first doesn’t have complete documentation regarding antibiotic treatment; second – another isolate: *Candida pasapsilosis*

4. Karadag Oncel E, Boyraz MS, Kara A. Black tongue associated with Kocuria (Micrococcus) kristinae bacteremia in a 4-month-old infant. Eur J Pediatr. 2012 Mar;171(3):593.– no information regarding exact method of identification of Kocuria, incomplete documentation

5. Martinaud C, Gisserot O, Gaillard T, Brisou P, de Jaureguiberry JP. [Bacteremia caused by Kocuria kristinae in a patient with acute leukaemia]. Med Mal Infect. 2008 Jun;38(6):334-5. doi: 10.1016/j.medmal.2008.02.006. French. i Martinaud C, Gaillard T, Brisou P, Gisserot O, de Jaureguiberry JP. [Bacteremia caused by Kocuria kristinae in a patient with acute leukaemia]. Med Mal Infect. 2008 Mar;38(3):165-6. doi: 10.1016/j.medmal.2007.11.006. Epub 2008 Jan 10. French. – Mycobacterium tuberculosis infection: “À l’admission, chez un patient à l’état général très altéré (PS = 4), l’examen notait une pleuropneumopathie bibasale et une ascite de moyenne abondance, stables, liées à l’infection à Mycobacterium tuberculosis, traitée depuis deux mois par trithérapie antituberculeuse.”

**SCIndeks**

**Search strategy:** (ARTAK: (Kocuria OR Micrococcus) AND kristinae AND (infection OR infections OR “bloodstream infection” OR endocarditis OR sepsis OR “urinary tract infection” OR pathogen OR bacteremia OR bacteraemia OR peritonitis OR cholecystitis OR synovitis OR bursitis OR osteoarthritis OR arthritis OR empyema OR catheter OR catheterized OR patient OR pneumonia OR bronchitis OR sinusitis OR encephalitis OR meningitis OR abscess))

**Total number of results**: 1

**Number of publications which fulfill inclusion criteria**: 1

1. Folić M, Janković S, Ružić-Zečević D, Pajević V, Rosić N, Nikolić P. Synovitis and periarticular bursitis of the coxofemoral joint caused by Kocuria Kristinae: A case report. Acta Facultatis Medicae Naissensis. 2010;27(1):51-54.

**ClinicalTrials.gov**

**Search strategy**: Condition or disease: kocuria kristinae

**Total number of results**: 0

**Number of publications which fulfill inclusion criteria**: 0

**Cochrane database of published clinical trials – CENTRAL**

**Search strategy:** '(Kocuria OR Micrococcus) AND kristinae AND (infection OR infections OR “bloodstream infection” OR endocarditis OR sepsis OR “urinary tract infection” OR pathogen OR bacteremia OR bacteraemia OR peritonitis OR cholecystitis OR synovitis OR bursitis OR osteoarthritis OR arthritis OR empyema OR catheter OR catheterized OR patient OR pneumonia OR bronchitis OR sinusitis OR encephalitis OR meningitis OR abscess) in Title, Abstract, Keywords in Trials'

**Total number of results**: There is 1 result from 1130850 records for your search.

**Number of publications which fulfill inclusion criteria:** 0

**Scopus**

**Search strategy:** ( kocuria OR micrococcus ) AND kristinae AND ( infection OR infections OR "bloodstream infection" OR endocarditis OR sepsis OR "urinary tract infection" OR pathogen OR bacteremia OR bacteraemia OR peritonitis OR cholecystitis OR synovitis OR bursitis OR osteoarthritis OR arthritis OR empyema OR catheter OR catheterized OR patient OR pneumonia OR bronchitis OR sinusitis OR encephalitis OR meningitis OR abscess )

**Total number of results**: 198

**Number of publications which fulfill inclusion criteria:** 19

1. Kolikonda MK, Jayakumar P, Sriramula S, Lippmann S. Kocuria kristinae infection during adalimumab treatment. Postgrad Med. 2017 Mar;129(2):296-298. doi: 10.1080/00325481.2017.1250606.

2. González-Arenas E, Castro-Soto-Reyes LM, Sánchez-Camacho V, Yalaupari-Mejía JP. Osteoartritis séptica por Kocuria kristinae. Reporte de un caso. Revista Mexicana de Pediatría. 2017 May 15;84(1):21-4.

3. Robles-Marhuenda A, Romero-Gómez MP, García-Rodríguez J, Arnalich-Fernández F. Native valve endocarditis caused by Kocuria kristinae. Enferm Infecc Microbiol Clin. 2016 Aug-Sep;34(7):464-5. doi: 10.1016/j.eimc.2015.09.008.

4. Bhavsar SM, Hamula CL, Dingle TC. Report of two paediatric cases of central line infections caused by species of the genus Kocuria. JMM case reports. 2016 Jun 25;3(3).

5. Sivaraman U, Subramanian P, Ramakrishnan K, Seetha KS. Umbilical Sepsis Caused by Multidrug Resistant Strain of Kocuria kristinae in a New Born: A Case Report. J Clin Diagn Res. 2016 Apr;10(4):DD01-2. doi: 10.7860/JCDR/2016/15665.7560.

6. Aleksic D, Miletic-Drakulic S, Boskovic-Matic T, Simovic S, Toncev G. Unusual case of stroke related to Kocuria Kristinae endocarditis treated with surgical procedure. Hippokratia. 2016 Jul-Sep;20(3):231-234. -

7. Chen HM, Chi H, Chiu NC, Huang FY. Kocuria kristinae: a true pathogen in pediatric patients. J Microbiol Immunol Infect. 2015 Feb;48(1):80-4. doi: 10.1016/j.jmii.2013.07.001.

8. Ahmed NH, Biswal I, Roy P, Grover RK. Kocuria kristinae, an unusual pathogen causing opportunistic infections in patients with malignancy. Indian J Med Microbiol. 2014 Oct-Dec;32(4):456-8. doi: 10.4103/0255-0857.142232.

9. Mutlu M, Aslan Y, Gokdogan D, Surer L, Aktas F. Septic arthritis caused by Kocuria kristinae in a newborn. Hong Kong Journal of Paediatrics. 2013 Oct 1;18(4):223-5.

10. Seyman D, Kizilates F, Oztoprak N, Ayoglu RU, Arslan S. Kocuria kristinae: a rare cause of infective endocarditis involving 2 native valves. Infectious Diseases in Clinical Practice. 2013 Nov 1;21(6):407-9.

11. Tewari R, Dudeja M, Das AK, Nandy S. Kocuria kristinae in catheter associated urinary tract infection: a case report. J Clin Diagn Res. 2013 Aug;7(8):1692-3. doi: 10.7860/JCDR/2013/6077.3247

12. Citro R, Prota C, Greco L, Mirra M, Masullo A, Silverio A, Bossone E, Piscione F. Kocuria kristinae endocarditis related to diabetic foot infection. J Med Microbiol. 2013 Jun;62(Pt 6):932-4. doi: 10.1099/jmm.0.054536-0.

13. Dunn R, Bares S, David MZ. Central venous catheter-related bacteremia caused by Kocuria kristinae: case report and review of the literature. Ann Clin Microbiol Antimicrob. 2011 Aug 24;10:31. doi: 10.1186/1476-0711-10-31.

14. Cheung CY, Cheng NH, Chau KF, Li CS. An unusual organism for CAPD-related peritonitis: Kocuria kristinae. Perit Dial Int. 2011 Jan-Feb;31(1):107-8. doi: 10.3747/pdi.2010.00125.

15. Folić M, Janković S, Ružić-Zečević D, Pajević V, Rosić N, Nikolić P. Synovitis and periarticular bursitis of the coxofemoral joint caused by Kocuria Kristinae: A case report. Acta Facultatis Medicae Naissensis. 2010;27(1):51-54

16. Carlini A, Mattei R, Lucarotti I, Bartelloni A, Rosati A. Kocuria kristinae: an unusual cause of acute peritoneal dialysis-related infection. Perit Dial Int. 2011 Jan-Feb;31(1):105-7.

17. Lai CC, Wang JY, Lin SH, Tan CK, Wang CY, Liao CH, Chou CH, Huang YT, Lin HI, Hsueh PR. Catheter-related bacteraemia and infective endocarditis caused by Kocuria species. Clin Microbiol Infect. 2011 Feb;17(2):190-2. doi: 10.1111/j.1469-0691.2010.03211.x.

18. Ma ES, Wong CL, Lai KT, Chan EC, Yam WC, Chan AC. Kocuria kristinae infection associated with acute cholecystitis. BMC Infect Dis. 2005 Jul 19;5:60.

19. Basaglia G, Carretto E, Barbarini D, Moras L, Scalone S, Marone P, De Paoli P. Catheter-related bacteremia due to Kocuria kristinae in a patient with ovarian cancer. J Clin Microbiol. 2002 Jan;40(1):311-3.

**K. Kristinae publications which don’t fulfill inclusion criteria**:

1. Atas DB, Arikan H, Aykent B, Asicioglu E, Velioglu A, Tuglular S, Ozener C. Uncommon presentation of CAPD-related peritonitis with unusual organism: Kocuria kristinae. Case report and review of the literature. Marmara Medical Journal. 2017;30:44-6. – no information regarding exact method of identification of Kocuria

2. Aydin M, Ganschow R, Jankofsky M. Kocuria kristinae-caused sepsis in an infant with congenital tufting enteropathy. Turk J Pediatr. 2017;59(1):93-96. - another isolate: *S. epidermidis*

3. Wu R, Shen N, Zhu H, He B. Kocuria kristinae bacteremia in a diabetic patient: one case report and literature review. Chinese Journal of Infection and Chemotherapy 2015; 15(4):380-382. – article in Chinese, only abstract, full text is not available (http://caod.oriprobe.com/articles/46686223/Kocuria_kristinae_bacteremia_in_a_diabetic_patient__one_case_report_an.htm; http://www.cjic.com.cn/mulu154.htm)

4. Chávez Valencia V, Orizaga de la Cruz C, Aguilar Bixano O, Huerta Ruíz MK, Sánchez Estrada EE. [Infections due to Kocuria kristinae: case reports of two patients and review of the literature]. Gac Med Mex. 2014 Dec;150 Suppl 2:183-5. Spanish. – two cases – first doesn’t have complete documentation regarding antibiotic treatment; second – another isolate: *Candida pasapsilosis*

5. Bastidas AR, Vélez CA, Gutiérrez CV, Bahamón NJ. Bacterial endocarditis by Kocuria kristinae in an inmunocompetent patient: Case report. Revista Colombiana de Cardiología. 2013 Sep;20(5):316-9. - no information regarding exact method of identification of Kocuria

6. Karadag Oncel E, Boyraz MS, Kara A. Black tongue associated with Kocuria (Micrococcus) kristinae bacteremia in a 4-month-old infant. Eur J Pediatr. 2012 Mar;171(3):593.– no information regarding exact method of identification of Kocuria, incomplete documentation

7. Martinaud C, Gisserot O, Gaillard T, Brisou P, de Jaureguiberry JP. [Bacteremia caused by Kocuria kristinae in a patient with acute leukaemia]. Med Mal Infect. 2008 Jun;38(6):334-5. doi: 10.1016/j.medmal.2008.02.006. French. i Martinaud C, Gaillard T, Brisou P, Gisserot O, de Jaureguiberry JP. [Bacteremia caused by Kocuria kristinae in a patient with acute leukaemia]. Med Mal Infect. 2008 Mar;38(3):165-6. doi: 10.1016/j.medmal.2007.11.006. Epub 2008 Jan 10. French. – Mycobacterium tuberculosis infection: “À l’admission, chez un patient à l’état général très altéré (PS = 4), l’examen notait une pleuropneumopathie bibasale et une ascite de moyenne abondance, stables, liées à l’infection à Mycobacterium tuberculosis, traitée depuis deux mois par trithérapie antituberculeuse.”

**EBSCO**

**Search strategy:**

Search Terms: (Kocuria OR Micrococcus) AND kristinae AND (infection OR infections OR “bloodstream infection” OR endocarditis OR sepsis OR “urinary tract infection” OR pathogen OR bacteremia OR bacteraemia OR peritonitis OR cholecystitis OR synovitis OR bursitis OR osteoarthritis OR arthritis OR empyema OR catheter OR catheterized OR patient OR pneumonia OR bronchitis OR sinusitis OR encephalitis OR meningitis OR abscess)

Source types: Academic Journals (625)

Interface - EBSCO Discovery Service
Search Screen - Advanced Search
Database - Discovery Service for KoBSON - Serbia

**Total number of results:** 625

**Number of publications which fulfill inclusion criteria:** 21

1. Berk H, Öztoprak Çuvalci N, Seyman D, Kizilateş F, Tahmaz A, Rezzukoğlu Ü. Toplum Kökenli İnfektif Endokarditin Nadir Etkenlerinden, Kocuria kristinae: İki Olgu Sunumu. (Turkish). Flora: The Journal Of Infectious Diseases & Clinical Microbiology. 2017;22(1):47. [Kocuria kristinae, a Rare Agent in Community-Acquired Infective Endocarditis: Two Case Reports. (English)]

2. Jermakow K, Mikołajków A, Pajączkowska M, Reczuch J, Fleischer M. Bakteriemia O Etiologii Kocuria Kristinae U Dziecka Przedwcześnie Urodzonego. Zakażenia Wywoływane Przez Szczepy Kocuria - Florę Fizjologiczną Skóry. Forum Zakażeń 2015;6(6):379-385. [Bloodstream Infection Due To Kocuria Kristinae In Preterm Infant. Infections Caused By Kocuria Strains - Human Skin Commensals. (English)]

3. Kimura M, Kawai E, Yaoita H, Ichinoi N, Sakamoto O, Kure S. Central Venous Catheter-Related Bloodstream Infection with Kocuria kristinae in a Patient with Propionic Acidemia. Case Rep Infect Dis. 2017;2017:1254175. doi: 10.1155/2017/1254175

4. Kolikonda MK, Jayakumar P, Sriramula S, Lippmann S. Kocuria kristinae infection during adalimumab treatment. Postgrad Med. 2017 Mar;129(2):296-298. doi: 10.1080/00325481.2017.1250606.

5. Aleksic D, Miletic-Drakulic S, Boskovic-Matic T, Simovic S, Toncev G. Unusual case of stroke related to Kocuria Kristinae endocarditis treated with surgical procedure. Hippokratia. 2016 Jul-Sep;20(3):231-234. –

6. Sivaraman U, Subramanian P, Ramakrishnan K, Seetha KS. Umbilical Sepsis Caused by Multidrug Resistant Strain of Kocuria kristinae in a New Born: A Case Report. J Clin Diagn Res. 2016 Apr;10(4):DD01-2. doi: 10.7860/JCDR/2016/15665.7560.

7. Robles-Marhuenda A, Romero-Gómez MP, García-Rodríguez J, Arnalich-Fernández F. Native valve endocarditis caused by Kocuria kristinae. Enferm Infecc Microbiol Clin. 2016 Aug-Sep;34(7):464-5. doi: 10.1016/j.eimc.2015.09.008.

8. Ahmed NH, Biswal I, Roy P, Grover RK. Kocuria kristinae, an unusual pathogen causing opportunistic infections in patients with malignancy. Indian J Med Microbiol. 2014 Oct-Dec;32(4):456-8. doi: 10.4103/0255-0857.142232.

9. Tewari R, Dudeja M, Das AK, Nandy S. Kocuria kristinae in catheter associated urinary tract infection: a case report. J Clin Diagn Res. 2013 Aug;7(8):1692-3. doi: 10.7860/JCDR/2013/6077.3247.

10. Chen HM, Chi H, Chiu NC, Huang FY. Kocuria kristinae: a true pathogen in pediatric patients. J Microbiol Immunol Infect. 2015 Feb;48(1):80-4. doi: 10.1016/j.jmii.2013.07.001.

11. Citro R, Prota C, Greco L, Mirra M, Masullo A, Silverio A, Bossone E, Piscione F. Kocuria kristinae endocarditis related to diabetic foot infection. J Med Microbiol. 2013 Jun;62(Pt 6):932-4. doi: 10.1099/jmm.0.054536-0.

12. Dunn R, Bares S, David MZ. Central venous catheter-related bacteremia caused by Kocuria kristinae: case report and review of the literature. Ann Clin Microbiol Antimicrob. 2011 Aug 24;10:31. doi: 10.1186/1476-0711-10-31.

13. Cheung CY, Cheng NH, Chau KF, Li CS. An unusual organism for CAPD-related peritonitis: Kocuria kristinae. Perit Dial Int. 2011 Jan-Feb;31(1):107-8. doi: 10.3747/pdi.2010.00125.

14. Carlini A, Mattei R, Lucarotti I, Bartelloni A, Rosati A. Kocuria kristinae: an unusual cause of acute peritoneal dialysis-related infection. Perit Dial Int. 2011 Jan-Feb;31(1):105-7.

15. Lai CC, Wang JY, Lin SH, Tan CK, Wang CY, Liao CH, Chou CH, Huang YT, Lin HI, Hsueh PR. Catheter-related bacteraemia and infective endocarditis caused by Kocuria species. Clin Microbiol Infect. 2011 Feb;17(2):190-2. doi: 10.1111/j.1469-0691.2010.03211.x.

16. Ma ES, Wong CL, Lai KT, Chan EC, Yam WC, Chan AC. Kocuria kristinae infection associated with acute cholecystitis. BMC Infect Dis. 2005 Jul 19;5:60.

17. Basaglia G, Carretto E, Barbarini D, Moras L, Scalone S, Marone P, De Paoli P. Catheter-related bacteremia due to Kocuria kristinae in a patient with ovarian cancer. J Clin Microbiol. 2002 Jan;40(1):311-3.

18. Folić M, Janković S, Ružić-Zečević D, Pajević V, Rosić N, Nikolić P. Synovitis and periarticular bursitis of the coxofemoral joint caused by Kocuria Kristinae: A case report. Acta Facultatis Medicae Naissensis. 2010;27(1):51-54.

19. González-Arenas E, Castro-Soto-Reyes LM, Sánchez-Camacho V, Yalaupari-Mejía JP. Osteoartritis séptica por Kocuria kristinae. Reporte de un caso. Revista Mexicana de Pediatría. 2017 May 15;84(1):21-4.

20. Mutlu M, Aslan Y, Gokdogan D, Surer L, Aktas F. Septic arthritis caused by Kocuria kristinae in a newborn. Hong Kong Journal of Paediatrics. 2013 Oct 1;18(4):223-5.

21. Seyman D, Kizilates F, Oztoprak N, Ayoglu RU, Arslan S. Kocuria kristinae: a rare cause of infective endocarditis involving 2 native valves. Infectious Diseases in Clinical Practice. 2013 Nov 1;21(6):407-9.

**K. Kristinae publications which don’t fulfill inclusion criteria:**

1. Atas DB, Arikan H, Aykent B, Asicioglu E, Velioglu A, Tuglular S, Ozener C. Uncommon presentation of CAPD-related peritonitis with unusual organism: Kocuria kristinae. Case report and review of the literature. Marmara Medical Journal. 2017;30:44-6. – no information regarding exact method of identification of Kocuria

2. Aydin M, Ganschow R, Jankofsky M. Kocuria kristinae-caused sepsis in an infant with congenital tufting enteropathy. Turk J Pediatr. 2017;59(1):93-96. - another isolate: *S. epidermidis*

3. Wu R, Shen N, Zhu H, He B. Kocuria kristinae bacteremia in a diabetic patient: one case report and literature review. Chinese Journal of Infection and Chemotherapy 2015; 15(4):380-382. – article in Chinese, only abstract, full text is not available (http://caod.oriprobe.com/articles/46686223/Kocuria_kristinae_bacteremia_in_a_diabetic_patient__one_case_report_an.htm; http://www.cjic.com.cn/mulu154.htm)

4. Chávez Valencia V, Orizaga de la Cruz C, Aguilar Bixano O, Huerta Ruíz MK, Sánchez Estrada EE. [Infections due to Kocuria kristinae: case reports of two patients and review of the literature]. Gac Med Mex. 2014 Dec;150 Suppl 2:183-5. Spanish. – two cases – first doesn’t have complete documentation regarding antibiotic treatment; second – another isolate: *Candida pasapsilosis*

5. Bastidas AR, Vélez CA, Gutiérrez CV, Bahamón NJ. Bacterial endocarditis by Kocuria kristinae in an inmunocompetent patient: Case report. Revista Colombiana de Cardiología. 2013 Sep;20(5):316-9. - no information regarding exact method of identification of Kocuria

6. Martinaud C, Gisserot O, Gaillard T, Brisou P, de Jaureguiberry JP. [Bacteremia caused by Kocuria kristinae in a patient with acute leukaemia]. Med Mal Infect. 2008 Jun;38(6):334-5. doi: 10.1016/j.medmal.2008.02.006. French. i Martinaud C, Gaillard T, Brisou P, Gisserot O, de Jaureguiberry JP. [Bacteremia caused by Kocuria kristinae in a patient with acute leukaemia]. Med Mal Infect. 2008 Mar;38(3):165-6. doi: 10.1016/j.medmal.2007.11.006. Epub 2008 Jan 10. French. – Mycobacterium tuberculosis infection: “À l’admission, chez un patient à l’état général très altéré (PS = 4), l’examen notait une pleuropneumopathie bibasale et une ascite de moyenne abondance, stables, liées à l’infection à Mycobacterium tuberculosis, traitée depuis deux mois par trithérapie antituberculeuse.”

7. Hassan RM, Bassiouny DM, Matar Y. Bacteremia Caused by Kocuria kristinae from Egypt: Are There More? A Case Report and Review of the Literature. Case Rep Infect Dis. 2016;2016:6318064. – another isolate: *E. coli* from urine

8. Karadag Oncel E, Boyraz MS, Kara A. Black tongue associated with Kocuria (Micrococcus) kristinae bacteremia in a 4-month-old infant. Eur J Pediatr. 2012 Mar;171(3):593.– no information regarding exact method of identification of Kocuria, incomplete documentation

Google Scholar

**Search strategy**: “kocuria kristinae”

**Total number of results:** 982

**Number of publications which fulfill inclusion criteria:** 23

1. Horino T, Shimamura Y, Ogata K, Inoue K, Terada Y. Kocuria kristinae septic arthritis associated with infectious endocarditis in a hemodialysis patient with diabetes mellitus: a case report and literature review. Renal Replacement Therapy. 2016 Dec;2(1):32.

2. Lakshmikantha M, Devki V, Yogesh C. Is Kocuria kristinae an upcoming pathogen?. Int. J. Curr. Microbiol. App. Sci. 2015;4(4):885-9.

3. Su H, Li S, Hao Z. Cesarean-Related Kocuria kristinae Bacteremia. International Journal of Medical and Pharmaceutical Case Reports 2015;4(5):113-116.

4. Kim KY, Cho JH, Yu CM, Lee KJ, Lee JM, Koh S, Kwon M, Jeong D. A Case of Community-acquired Bacteremic Empyema Caused by Kocuria kristinae. Infection & Chemotherapy. 2017 Jan 16;49;e49.

5. Kimura M, Kawai E, Yaoita H, Ichinoi N, Sakamoto O, Kure S. Central Venous Catheter-Related Bloodstream Infection with Kocuria kristinae in a Patient with Propionic Acidemia. Case Rep Infect Dis. 2017;2017:1254175. doi: 10.1155/2017/1254175

6. Kolikonda MK, Jayakumar P, Sriramula S, Lippmann S. Kocuria kristinae infection during adalimumab treatment. Postgrad Med. 2017 Mar;129(2):296-298. doi: 10.1080/00325481.2017.1250606.

7. Aleksic D, Miletic-Drakulic S, Boskovic-Matic T, Simovic S, Toncev G. Unusual case of stroke related to Kocuria Kristinae endocarditis treated with surgical procedure. Hippokratia. 2016 Jul-Sep;20(3):231-234. - "Blood cultures grew positive for Kocuria kristinae. The microorganism isolated from the blood culture of our patient was sensitive ..." – ne piše kako je tačno identifikovano

8. Sivaraman U, Subramanian P, Ramakrishnan K, Seetha KS. Umbilical Sepsis Caused by Multidrug Resistant Strain of Kocuria kristinae in a New Born: A Case Report. J Clin Diagn Res. 2016 Apr;10(4):DD01-2. doi: 10.7860/JCDR/2016/15665.7560.

9. Robles-Marhuenda A, Romero-Gómez MP, García-Rodríguez J, Arnalich-Fernández F. Native valve endocarditis caused by Kocuria kristinae. Enferm Infecc Microbiol Clin. 2016 Aug-Sep;34(7):464-5. doi: 10.1016/j.eimc.2015.09.008.

10. Ahmed NH, Biswal I, Roy P, Grover RK. Kocuria kristinae, an unusual pathogen causing opportunistic infections in patients with malignancy. Indian J Med Microbiol. 2014 Oct-Dec;32(4):456-8. doi: 10.4103/0255-0857.142232.

11. Tewari R, Dudeja M, Das AK, Nandy S. Kocuria kristinae in catheter associated urinary tract infection: a case report. J Clin Diagn Res. 2013 Aug;7(8):1692-3. doi: 10.7860/JCDR/2013/6077.3247.

12. Chen HM, Chi H, Chiu NC, Huang FY. Kocuria kristinae: a true pathogen in pediatric patients. J Microbiol Immunol Infect. 2015 Feb;48(1):80-4. doi: 10.1016/j.jmii.2013.07.001.

13. Citro R, Prota C, Greco L, Mirra M, Masullo A, Silverio A, Bossone E, Piscione F. Kocuria kristinae endocarditis related to diabetic foot infection. J Med Microbiol. 2013 Jun;62(Pt 6):932-4. doi: 10.1099/jmm.0.054536-0.

14. Dunn R, Bares S, David MZ. Central venous catheter-related bacteremia caused by Kocuria kristinae: case report and review of the literature. Ann Clin Microbiol Antimicrob. 2011 Aug 24;10:31. doi: 10.1186/1476-0711-10-31.

15. Cheung CY, Cheng NH, Chau KF, Li CS. An unusual organism for CAPD-related peritonitis: Kocuria kristinae. Perit Dial Int. 2011 Jan-Feb;31(1):107-8. doi: 10.3747/pdi.2010.00125.

16. Carlini A, Mattei R, Lucarotti I, Bartelloni A, Rosati A. Kocuria kristinae: an unusual cause of acute peritoneal dialysis-related infection. Perit Dial Int. 2011 Jan-Feb;31(1):105-7.

17. Lai CC, Wang JY, Lin SH, Tan CK, Wang CY, Liao CH, Chou CH, Huang YT, Lin HI, Hsueh PR. Catheter-related bacteraemia and infective endocarditis caused by Kocuria species. Clin Microbiol Infect. 2011 Feb;17(2):190-2. doi: 10.1111/j.1469-0691.2010.03211.x.

18. Ma ES, Wong CL, Lai KT, Chan EC, Yam WC, Chan AC. Kocuria kristinae infection associated with acute cholecystitis. BMC Infect Dis. 2005 Jul 19;5:60.

19. Basaglia G, Carretto E, Barbarini D, Moras L, Scalone S, Marone P, De Paoli P. Catheter-related bacteremia due to Kocuria kristinae in a patient with ovarian cancer. J Clin Microbiol. 2002 Jan;40(1):311-3.

20. Folić M, Janković S, Ružić-Zečević D, Pajević V, Rosić N, Nikolić P. Synovitis and periarticular bursitis of the coxofemoral joint caused by Kocuria Kristinae: A case report. Acta Facultatis Medicae Naissensis. 2010;27(1):51-54.

21. González-Arenas E, Castro-Soto-Reyes LM, Sánchez-Camacho V, Yalaupari-Mejía JP. Osteoartritis séptica por Kocuria kristinae. Reporte de un caso. Revista Mexicana de Pediatría. 2017 May 15;84(1):21-4.

22. Mutlu M, Aslan Y, Gokdogan D, Surer L, Aktas F. Septic arthritis caused by Kocuria kristinae in a newborn. Hong Kong Journal of Paediatrics. 2013 Oct 1;18(4):223-5.

23. Seyman D, Kizilates F, Oztoprak N, Ayoglu RU, Arslan S. Kocuria kristinae: a rare cause of infective endocarditis involving 2 native valves. Infectious Diseases in Clinical Practice. 2013 Nov 1;21(6):407-9.

**K. Kristinae publications which don’t fulfill inclusion criteria:**

1. Dinesh K, Saikumar C. A Rare isolate of Kocuria kristinae in Catheterized Patient. Int. J. Adv. Microbiol. Health. Res. 2018;2(1):55-6. – incomplete documentation, no information regarding used antibiotics, but only about resistance to antibiotics

2. Atas DB, Arikan H, Aykent B, Asicioglu E, Velioglu A, Tuglular S, Ozener C. Uncommon presentation of CAPD-related peritonitis with unusual organism: Kocuria kristinae. Case report and review of the literature. Marmara Medical Journal. 2017;30:44-6. – no information regarding exact method of identification of *K. kristinae*

3. Aydin M, Ganschow R, Jankofsky M. Kocuria kristinae-caused sepsis in an infant with congenital tufting enteropathy. Turk J Pediatr. 2017;59(1):93-96. - another isolate: *S. epidermidis*

4. Wu R, Shen N, Zhu H, He B. Kocuria kristinae bacteremia in a diabetic patient: one case report and literature review. Chinese Journal of Infection and Chemotherapy 2015; 15(4):380-382. – article in Chinese, only abstract, full text is not available (http://caod.oriprobe.com/articles/46686223/Kocuria_kristinae_bacteremia_in_a_diabetic_patient__one_case_report_an.htm; http://www.cjic.com.cn/mulu154.htm)

5. Chávez Valencia V, Orizaga de la Cruz C, Aguilar Bixano O, Huerta Ruíz MK, Sánchez Estrada EE. [Infections due to Kocuria kristinae: case reports of two patients and review of the literature]. Gac Med Mex. 2014 Dec;150 Suppl 2:183-5. Spanish. – two cases – first doesn’t have complete documentation regarding antibiotic treatment; second – another isolate: *Candida pasapsilosis*

6. Bastidas AR, Vélez CA, Gutiérrez CV, Bahamón NJ. Bacterial endocarditis by Kocuria kristinae in an inmunocompetent patient: Case report. Revista Colombiana de Cardiología. 2013 Sep;20(5):316-9. - no information regarding exact method of identification of *K. kristinae*

7. Martinaud C, Gisserot O, Gaillard T, Brisou P, de Jaureguiberry JP. [Bacteremia caused by Kocuria kristinae in a patient with acute leukaemia]. Med Mal Infect. 2008 Jun;38(6):334-5. doi: 10.1016/j.medmal.2008.02.006. French. i Martinaud C, Gaillard T, Brisou P, Gisserot O, de Jaureguiberry JP. [Bacteremia caused by Kocuria kristinae in a patient with acute leukaemia]. Med Mal Infect. 2008 Mar;38(3):165-6. doi: 10.1016/j.medmal.2007.11.006. Epub 2008 Jan 10. French. – Mycobacterium tuberculosis infection: “À l’admission, chez un patient à l’état général très altéré (PS = 4), l’examen notait une pleuropneumopathie bibasale et une ascite de moyenne abondance, stables, liées à l’infection à Mycobacterium tuberculosis, traitée depuis deux mois par trithérapie antituberculeuse.”

8. Hassan RM, Bassiouny DM, Matar Y. Bacteremia Caused by Kocuria kristinae from Egypt: Are There More? A Case Report and Review of the Literature. Case Rep Infect Dis. 2016;2016:6318064. – another isolate: *E. coli* from urine

**List of publications which fulfill inclusion criteria after performing search in all databases:**

1. Kimura M, Kawai E, Yaoita H, Ichinoi N, Sakamoto O, Kure S. Central Venous Catheter-Related Bloodstream Infection with Kocuria kristinae in a Patient with Propionic Acidemia. Case Rep Infect Dis. 2017;2017:1254175. doi: 10.1155/2017/1254175

2. Kolikonda MK, Jayakumar P, Sriramula S, Lippmann S. Kocuria kristinae infection during adalimumab treatment. Postgrad Med. 2017 Mar;129(2):296-298. doi: 10.1080/00325481.2017.1250606.

3. Aleksic D, Miletic-Drakulic S, Boskovic-Matic T, Simovic S, Toncev G. Unusual case of stroke related to Kocuria Kristinae endocarditis treated with surgical procedure. Hippokratia. 2016 Jul-Sep;20(3):231-234.

4. Sivaraman U, Subramanian P, Ramakrishnan K, Seetha KS. Umbilical Sepsis Caused by Multidrug Resistant Strain of Kocuria kristinae in a New Born: A Case Report. J Clin Diagn Res. 2016 Apr;10(4):DD01-2. doi: 10.7860/JCDR/2016/15665.7560.

5. Robles-Marhuenda A, Romero-Gómez MP, García-Rodríguez J, Arnalich-Fernández F. Native valve endocarditis caused by Kocuria kristinae. Enferm Infecc Microbiol Clin. 2016 Aug-Sep;34(7):464-5. doi: 10.1016/j.eimc.2015.09.008.

6. Ahmed NH, Biswal I, Roy P, Grover RK. Kocuria kristinae, an unusual pathogen causing opportunistic infections in patients with malignancy. Indian J Med Microbiol. 2014 Oct-Dec;32(4):456-8. doi: 10.4103/0255-0857.142232.

7. Tewari R, Dudeja M, Das AK, Nandy S. Kocuria kristinae in catheter associated urinary tract infection: a case report. J Clin Diagn Res. 2013 Aug;7(8):1692-3. doi: 10.7860/JCDR/2013/6077.3247.

8. Chen HM, Chi H, Chiu NC, Huang FY. Kocuria kristinae: a true pathogen in pediatric patients. J Microbiol Immunol Infect. 2015 Feb;48(1):80-4. doi: 10.1016/j.jmii.2013.07.001.

9. Citro R, Prota C, Greco L, Mirra M, Masullo A, Silverio A, Bossone E, Piscione F. Kocuria kristinae endocarditis related to diabetic foot infection. J Med Microbiol. 2013 Jun;62(Pt 6):932-4. doi: 10.1099/jmm.0.054536-0.

10. Dunn R, Bares S, David MZ. Central venous catheter-related bacteremia caused by Kocuria kristinae: case report and review of the literature. Ann Clin Microbiol Antimicrob. 2011 Aug 24;10:31. doi: 10.1186/1476-0711-10-31.

11. Cheung CY, Cheng NH, Chau KF, Li CS. An unusual organism for CAPD-related peritonitis: Kocuria kristinae. Perit Dial Int. 2011 Jan-Feb;31(1):107-8. doi: 10.3747/pdi.2010.00125.

12. Carlini A, Mattei R, Lucarotti I, Bartelloni A, Rosati A. Kocuria kristinae: an unusual cause of acute peritoneal dialysis-related infection. Perit Dial Int. 2011 Jan-Feb;31(1):105-7.

13. Lai CC, Wang JY, Lin SH, Tan CK, Wang CY, Liao CH, Chou CH, Huang YT, Lin HI, Hsueh PR. Catheter-related bacteraemia and infective endocarditis caused by Kocuria species. Clin Microbiol Infect. 2011 Feb;17(2):190-2. doi: 10.1111/j.1469-0691.2010.03211.x.

14. Ma ES, Wong CL, Lai KT, Chan EC, Yam WC, Chan AC. Kocuria kristinae infection associated with acute cholecystitis. BMC Infect Dis. 2005 Jul 19;5:60.

15. Basaglia G, Carretto E, Barbarini D, Moras L, Scalone S, Marone P, De Paoli P. Catheter-related bacteremia due to Kocuria kristinae in a patient with ovarian cancer. J Clin Microbiol. 2002 Jan;40(1):311-3.

16. Folić M, Janković S, Ružić-Zečević D, Pajević V, Rosić N, Nikolić P. Synovitis and periarticular bursitis of the coxofemoral joint caused by Kocuria Kristinae: A case report. Acta Facultatis Medicae Naissensis. 2010;27(1):51-54.

17. González-Arenas E, Castro-Soto-Reyes LM, Sánchez-Camacho V, Yalaupari-Mejía JP. Osteoartritis séptica por Kocuria kristinae. Reporte de un caso. Revista Mexicana de Pediatría. 2017 May 15;84(1):21-4.

18. Bhavsar SM, Hamula CL, Dingle TC. Report of two paediatric cases of central line infections caused by species of the genus Kocuria. JMM case reports. 2016 Jun 25;3(3).

19. Mutlu M, Aslan Y, Gokdogan D, Surer L, Aktas F. Septic arthritis caused by Kocuria kristinae in a newborn. Hong Kong Journal of Paediatrics. 2013 Oct 1;18(4):223-5.

20. Seyman D, Kizilates F, Oztoprak N, Ayoglu RU, Arslan S. Kocuria kristinae: a rare cause of infective endocarditis involving 2 native valves. Infectious Diseases in Clinical Practice. 2013 Nov 1;21(6):407-9.

21. Horino T, Shimamura Y, Ogata K, Inoue K, Terada Y. Kocuria kristinae septic arthritis associated with infectious endocarditis in a hemodialysis patient with diabetes mellitus: a case report and literature review. Renal Replacement Therapy. 2016 Dec;2(1):32.

22. Lakshmikantha M, Devki V, Yogesh C. Is Kocuria kristinae an upcoming pathogen?. Int. J. Curr. Microbiol. App. Sci. 2015;4(4):885-9.

23. Su H, Li S, Hao Z. Cesarean-Related Kocuria kristinae Bacteremia. International Journal of Medical and Pharmaceutical Case Reports 2015;4(5):113-116.

24. Kim KY, Cho JH, Yu CM, Lee KJ, Lee JM, Koh S, Kwon M, Jeong D. A Case of Community-acquired Bacteremic Empyema Caused by Kocuria kristinae. Infection & Chemotherapy. 2017 Jan 16;49;e49.

25. Berk H, Öztoprak Çuvalci N, Seyman D, Kizilateş F, Tahmaz A, Rezzukoğlu Ü. Toplum Kökenli İnfektif Endokarditin Nadir Etkenlerinden, Kocuria kristinae: İki Olgu Sunumu. (Turkish). Flora: The Journal Of Infectious Diseases & Clinical Microbiology. 2017;22(1):47. [Kocuria kristinae, a Rare Agent in Community-Acquired Infective Endocarditis: Two Case Reports. (English)]

26. Jermakow K, Mikołajków A, Pajączkowska M, Reczuch J, Fleischer M. Bakteriemia O Etiologii Kocuria Kristinae U Dziecka Przedwcześnie Urodzonego. Zakażenia Wywoływane Przez Szczepy Kocuria - Florę Fizjologiczną Skóry. Forum Zakażeń 2015;6(6):379-385. [Bloodstream Infection Due To Kocuria Kristinae In Preterm Infant. Infections Caused By Kocuria Strains - Human Skin Commensals. (English)]

**K. Kristinae publications which don’t fulfill inclusion criteria**:

1. Atas DB, Arikan H, Aykent B, Asicioglu E, Velioglu A, Tuglular S, Ozener C. Uncommon presentation of CAPD-related peritonitis with unusual organism: Kocuria kristinae. Case report and review of the literature. Marmara Medical Journal. 2017;30:44-6. – no information regarding exact method of identification *K. kristinae*

2. Aydin M, Ganschow R, Jankofsky M. Kocuria kristinae-caused sepsis in an infant with congenital tufting enteropathy. Turk J Pediatr. 2017;59(1):93-96. - another isolate: *S. epidermidis*

3. Bastidas AR, Vélez CA, Gutiérrez CV, Bahamón NJ. Bacterial endocarditis by Kocuria kristinae in an inmunocompetent patient: Case report. Revista Colombiana de Cardiología. 2013 Sep;20(5):316-9. - no information regarding exact method of identification *K. kristinae*

4. Chávez Valencia V, Orizaga de la Cruz C, Aguilar Bixano O, Huerta Ruíz MK, Sánchez Estrada EE. [Infections due to Kocuria kristinae: case reports of two patients and review of the literature]. Gac Med Mex. 2014 Dec;150 Suppl 2:183-5. Spanish. – two cases – first doesn’t have complete documentation regarding antibiotic treatment; second – another isolate: *Candida pasapsilosis*

5. Dinesh K, Saikumar C. A Rare isolate of Kocuria kristinae in Catheterized Patient. Int. J. Adv. Microbiol. Health. Res. 2018;2(1):55-6. – incomplete documentation, no information regarding used antibiotics, but only about resistance to antibiotics

6. Hassan RM, Bassiouny DM, Matar Y. Bacteremia Caused by Kocuria kristinae from Egypt: Are There More? A Case Report and Review of the Literature. Case Rep Infect Dis. 2016;2016:6318064. – another isolate: *E. coli* from urine

7. Karadag Oncel E, Boyraz MS, Kara A. Black tongue associated with Kocuria (Micrococcus) kristinae bacteremia in a 4-month-old infant. Eur J Pediatr. 2012 Mar;171(3):593.– no information regarding exact method of identification *K. kristinae,* incomplete documentation

8. Martinaud C, Gisserot O, Gaillard T, Brisou P, de Jaureguiberry JP. [Bacteremia caused by Kocuria kristinae in a patient with acute leukaemia]. Med Mal Infect. 2008 Jun;38(6):334-5. doi: 10.1016/j.medmal.2008.02.006. French. i Martinaud C, Gaillard T, Brisou P, Gisserot O, de Jaureguiberry JP. [Bacteremia caused by Kocuria kristinae in a patient with acute leukaemia]. Med Mal Infect. 2008 Mar;38(3):165-6. doi: 10.1016/j.medmal.2007.11.006. Epub 2008 Jan 10. French. – Mycobacterium tuberculosis infection: “À l’admission, chez un patient à l’état général très altéré (PS = 4), l’examen notait une pleuropneumopathie bibasale et une ascite de moyenne abondance, stables, liées à l’infection à Mycobacterium tuberculosis, traitée depuis deux mois par trithérapie antituberculeuse.”

9. Wu R, Shen N, Zhu H, He B. Kocuria kristinae bacteremia in a diabetic patient: one case report and literature review. Chinese Journal of Infection and Chemotherapy 2015; 15(4):380-382. – article in Chinese, only abstract, full text is not available (http://caod.oriprobe.com/articles/46686223/Kocuria_kristinae_bacteremia_in_a_diabetic_patient__one_case_report_an.htm; http://www.cjic.com.cn/mulu154.htm)

## Search strategy MM

**MM search strategy**

**MEDLINE**

**Search strategies:**

**1)** (kocuria[All Fields] AND kristinae[All Fields]) AND ((invasive[All Fields] AND ("infection"[MeSH Terms] OR "infection"[All Fields] OR "infections"[All Fields])) OR ("pneumonia"[MeSH Terms] OR "pneumonia"[All Fields]) OR ("catheter-related infections"[MeSH Terms] OR ("catheter-related"[All Fields] AND "infections"[All Fields]) OR "catheter-related infections"[All Fields] OR ("catheter"[All Fields] AND "related"[All Fields] AND "infections"[All Fields]) OR "catheter related infections"[All Fields]) OR SIRS[All Fields] OR ("endocarditis"[MeSH Terms] OR "endocarditis"[All Fields]) OR ("respiratory tract infections"[MeSH Terms] OR ("respiratory"[All Fields] AND "tract"[All Fields] AND "infections"[All Fields]) OR "respiratory tract infections"[All Fields] OR ("respiratory"[All Fields] AND "infection"[All Fields]) OR "respiratory infection"[All Fields]) OR ("peritonitis"[MeSH Terms] OR "peritonitis"[All Fields]) OR ("urinary tract infections"[MeSH Terms] OR ("urinary"[All Fields] AND "tract"[All Fields] AND "infections"[All Fields]) OR "urinary tract infections"[All Fields] OR ("urinary"[All Fields] AND "infection"[All Fields]) OR "urinary infection"[All Fields])) **20 hits**

2) Kocuria kristinae **48 hits (15 studies met inclusion criteria)**

| **Study** | **Invasive bacterial infection** | **Diagnostic criteria (MALDI-TOF spectrometry and 16S Rna sequencing** | **Kocuria kristinae is the only MO isolated from patient** | Review article (study design) | Non-human species | Incomplete data |
| --- | --- | --- | --- | --- | --- | --- |
| Isolation of antimicrobial producing Actinobacteria  from soil samples |  |  |  |  | **Has this exclusion criteria** |  |
| Kocuria kristinae-caused sepsis in an infant with congenital tufting enteropathy |  | **Does not meet this criteria** | **Does not meet this criteria** |  |  |  |
| Reply to «Observations on native valve endocarditis caused by Kocuria kristinae» |  |  |  | **Has this exclusion criteria** |  |  |
| Kocuria rosea, kocuria kristinae, leuconostoc mesenteroides as caries-causing representatives of oral microflora. | **Does not meet this criteria** |  |  |  |  |  |
| Observations on "Native valve endocarditis caused by Kocuria kristinae" |  |  |  | **Has this exclusion criteria** |  |  |
| **Central Venous Catheter-Related Bloodstream Infection with Kocuria kristinae in a Patient with Propionic Acidemia.** | **Met all inclusion criteria and has no exclusion criteria.** | | | | | |
| Microorganisms and heavy metals associated with atmospheric deposition in a congested urban environment of a developing country: Sri Lanka. |  |  |  |  | **Has this exclusion criteria** |  |
| Bacteremia Caused by Kocuria kristinae from Egypt: Are There More? A Case Report and Review of the Literature. |  |  | **Does not meet this criteria** |  |  |  |
| **Kocuria kristinae infection during adalimumab treatment.** | **Met all inclusion criteria and has no exclusion criteria** | | | | | |
| **Unusual case of stroke related to Kocuria Kristinae endocarditis treated with surgical procedure.** | **Met all inclusion criteria and has no exclusion criteria** | | | | | |
| **Umbilical Sepsis Caused by Multidrug Resistant Strain of Kocuria kristinae in a New Born: A Case Report.** | **Met all inclusion criteria and has no exclusion criteria** | | | | | |
| Evaluation of bacterial contamination of dental unit waterlines and use of a newly designed measurement device to assess retraction of a dental chair unit**.** |  |  |  |  | **Has this exclusion criteria** |  |
| Microbiological Contamination of Drugs during Their Administration for Anesthesia in the Operating Room. | **Does not met this criteria** |  |  |  |  |  |
| Evaluation of autochthonous micrococcus strains as starter cultures for the production of Kedong sufu**.** |  |  |  |  | **Has this exclusion criteria** |  |
| Native valve endocarditis caused by Kocuria kristina**e** | **Met all inclusion criteria and has no exclusion criteria** | | | | | |
| Bovine vaginal strain Kocuria kristinae and its characterization. |  |  |  |  | **Has this exclusion criteria** |  |
| [Infections due to Kocuria kristinae: case reports of two patients and review of the literature]. |  | **Does not meet this criteria** | **Does not meet this criteria** |  |  |  |
| Application of autochthonous mixed starter for controlled Kedong sufu fermentation in pilot plant tests. |  |  |  |  | **Has this exclusion criteria** |  |
| Identification of non-Listeria spp. bacterial isolates yielding a β-D-glucosidase-positive phenotype on Agar Listeria according to Ottaviani and Agosti (ALOA). |  |  |  |  | **Has this exclusion criteria** |  |
| **Kocuria kristinae, an unusual pathogen causing opportunistic infections in patients with malignancy.** | **Met all inclusion criteria and has no exclusion criteria** | | | | | |
| Adherence of bacteria to mucus collected from different parts of the reproductive tract of heifers and cows. |  |  |  |  | **Has this exclusion criteria** |  |
| **Kocuria kristinae in catheter associated urinary tract infection: a case report.** | **Met all inclusion criteria and has no exclusion criteria** | | | | | |
| **Kocuria kristinae: a true pathogen in pediatric patients.** | **Met all inclusion criteria and has no exclusion criteria** | | | | | |
| **Kocuria kristinae endocarditis related to diabetic foot infection.** | **Met all inclusion criteria and has no exclusion criteria** | | | | | |
| Evaluation of bacterial flora during the ripening of Kedong sufu, a typical Chinese traditional bacteria-fermented soybeanproduct. |  |  |  |  | **Has this exclusion criteria** |  |
| Nonspecific Bacterial Flora Isolated from the Body Surface and Inside Ixodes ricinus Ticks. |  |  |  |  | **Has this exclusion criteria** |  |
| Black tongue associated with Kocuria (Micrococcus) kristinae bacteremia in a 4-month-old infant. |  | **Does not meet this criteria** |  |  |  |  |
| **Central venous catheter-related bacteremia caused by Kocuria kristinae: case report and review of the literature** | **Met all inclusion criteria and has no exclusion criteria** | | | | | |
| **An unusual organism for CAPD-related peritonitis: Kocuria kristinae.** | **Met all inclusion criteria and has no exclusion criteria** | | | | | |
| **Kocuria kristinae: an unusual cause of acute peritoneal dialysis-related infection.** | **Met all inclusion criteria and has no exclusion criteria** | | | | | |
| Kocuria varians infection associated with brain abscess: a case report. |  |  | **Does not meet this criteria** |  |  |  |
| **Catheter-related bacteraemia and infective endocarditis caused by Kocuria species.** | **Met all inclusion criteria and has no exclusion criteria** | | | | | |
| Effects of bovine milk lactoperoxidase system on some bacteria. |  |  |  |  | **Has this exclusion criteria** |  |
| Kocuria koreensis sp. nov., isolated from fermentedseafood. |  |  | **Does not meet this criteria** |  | **Has this exclusion criteria** |  |
| Kocuria halotolerans sp. nov., an actinobacterium isolated from a saline soil in China. |  |  | **Does not meet this criteria** |  | **Has this exclusion criteria** |  |
| [Bacteremia caused by Kocuria kristinae in a patient with acute leukaemia].  [Article in French] |  |  | **Does not meet this criteria** |  |  |  |
| [Bacteremia caused by Kocuria kristinae in a patient with acute leukaemia]. |  |  | **Does not meet this criteria** |  |  |  |
| Biodiversity of bacterial ecosystems in traditional Egyptian Domiati cheese. |  |  |  |  | **Has this exclusion criteria** |  |
| Microbiological characteristics of "androlla", a Spanish traditional pork sausage. |  |  |  |  | **Has this exclusion criteria** |  |
| Vitek 2 automated identification system and Kocuria kristinae. |  | **Does not meet this criteria** |  |  |  |  |
| **Kocuria kristinae infection associated with acute cholecystitis.** | **Met all inclusion criteria and has no exclusion criteria** | | | | | |
| [Occurrence and number of bacteria from the Micrococcus, Kocuria, Nesterenkonia, Kytococcus and Dermacoccus genera on skin and mucous membranes in humans]. | **Does not meet this criteria** |  |  |  |  |  |
| Time series analysis of aerobic bacterial flora during Miso fermentation**.** |  |  |  |  | **Has this exclusion criteria** |  |
| Kocuria polaris sp. nov., an orange-pigmented psychrophilic bacterium isolated from an Antarctic cyanobacterial mat sample. |  |  |  |  | **Has this exclusion criteria** |  |
| [Occurrence of bacteria in the mouth from genera of Micrococcus, Kocuria, Nesterenkonia, Kytococcus and Dermacoccus]. | **Does not meet this criteria** |  |  |  |  |  |
| **Catheter-related bacteremia due to Kocuria kristinae in a patient with ovarian cancer.** | **Met all inclusion criteria and has no exclusion criteria** | | | | | |
| Kocuria palustris sp. nov. and Kocuria rhizophila sp. nov., isolated from the rhizoplane of the narrow-leaved cattail (Typha angustifolia). |  |  |  |  | **Has this exclusion criteria** |  |
| Taxonomic dissection of the genus Micrococcus: Kocuria gen. nov., Nesterenkonia gen. nov., Kytococcus gen. nov., Dermacoccus gen. nov., and Micrococcus Cohn 1872 gen. emend. |  |  |  |  | **Has this exclusion criteria** |  |

**SCIndeks**

Search strategy: Kocuria kristinae **1 hit (1 study met inclusion criteria)**

1. Folić, M., Janković, S., Ružić-Zečević, D., Pajević, V., Rosić, N., & Nikolić, P. Sinovitis i periartikularni burzitis koksofemoralnog zgloba izazvani Kocuria kristinae - prikaz slučaja. Acta Facultatis Medicae Naissensis 2010, 27(1): 51-54.

**Cochrane database**

Search strategy: Kocuria kristinae 0 hits (0 study met inclusion criteria)

**ClinicalTrials.Gov**

Search strategy: Kocuria kristinae 0 hits (0 study met inclusion criteria)

**EBSCO**

Search strategy: Kocuria kristinae

760 hits (14 studies met inclusion criteria- (12 have already been found on MEDLINE database)); 2 additional studies are:

1. Berk H, Öztoprak Çuvalci N, Seyman D, Kizilateş F, Tahmaz A, Rezzukoğlu Ü. Toplum Kökenli İnfektif Endokarditin Nadir Etkenlerinden, Kocuria kristinae: İki Olgu Sunumu. (Turkish). Flora: The Journal Of Infectious Diseases & Clinical Microbiology. 2017;22(1):47. [Kocuria kristinae, a Rare Agent in Community-Acquired Infective Endocarditis: Two Case Reports. (English)]

2. Jermakow K, Mikołajków A, Pajączkowska M, Reczuch J, Fleischer M. Bakteriemia O Etiologii Kocuria Kristinae U Dziecka Przedwcześnie Urodzonego. Zakażenia Wywoływane Przez Szczepy Kocuria - Florę Fizjologiczną Skóry. Forum Zakażeń 2015;6(6):379-385. [Bloodstream Infection Due To Kocuria Kristinae In Preterm Infant. Infections Caused By Kocuria Strains - Human Skin Commensals. (English)].

**SCOPUS**

Search strategy: Kocuria kristinae

101 hits (17 studies met inclusion criteria - (13 have already been found on MEDLINE database)); 4 additional studies are:

1. González-Arenas E, Castro-Soto-Reyes LM, Sánchez-Camacho V, Yalaupari-Mejía JP. Osteoartritis séptica por Kocuria kristinae. Reporte de un caso. Revista Mexicana de Pediatría. 2017 May 15;84(1):21-4.

2. Bhavsar SM, Hamula CL, Dingle TC. Report of two paediatric cases of central line infections caused by species of the genus Kocuria. JMM case reports. 2016 Jun 25;3(3).

3. Mutlu M, Aslan Y, Gokdogan D, Surer L, Aktas F. Septic arthritis caused by Kocuria kristinae in a newborn. Hong Kong Journal of Paediatrics. 2013 Oct 1;18(4):223-5.

4. Seyman D, Kizilates F, Oztoprak N, Ayoglu RU, Arslan S. Kocuria kristinae: a rare cause of infective endocarditis involving 2 native valves. Infectious Diseases in Clinical Practice. 2013 Nov 1;21(6):407-9.

**Google Schoolar**

Search strategy: Kocuria kristinae

1170 hits (20 studies met inclusion criteria - (16 have already been found on MEDLINE database)); 4 additional studies are:

1. Horino T, Shimamura Y, Ogata K, Inoue K, Terada Y. Kocuria kristinae septic arthritis associated with infectious endocarditis in a hemodialysis patient with diabetes mellitus: a case report and literature review. Renal Replacement Therapy. 2016 Dec;2(1):32.

2. Lakshmikantha M, Devki V, Yogesh C. Is Kocuria kristinae an upcoming pathogen?. Int. J. Curr. Microbiol. App. Sci. 2015;4(4):885-9.

3. Su H, Li S, Hao Z. Cesarean-Related Kocuria kristinae Bacteremia. International Journal of Medical and Pharmaceutical Case Reports 2015;4(5):113-116.

4. Kim KY, Cho JH, Yu CM, Lee KJ, Lee JM, Koh S, Kwon M, Jeong D. A Case of Community-acquired Bacteremic Empyema Caused by Kocuria kristinae. Infection & Chemotherapy. 2017 Jan 16;49;e49.
